# Supplementary material
Source: MDPI journal article supplement (https://www.mdpi.com/2073-4441/16/2/274)
Supplement: s1 [file s1]

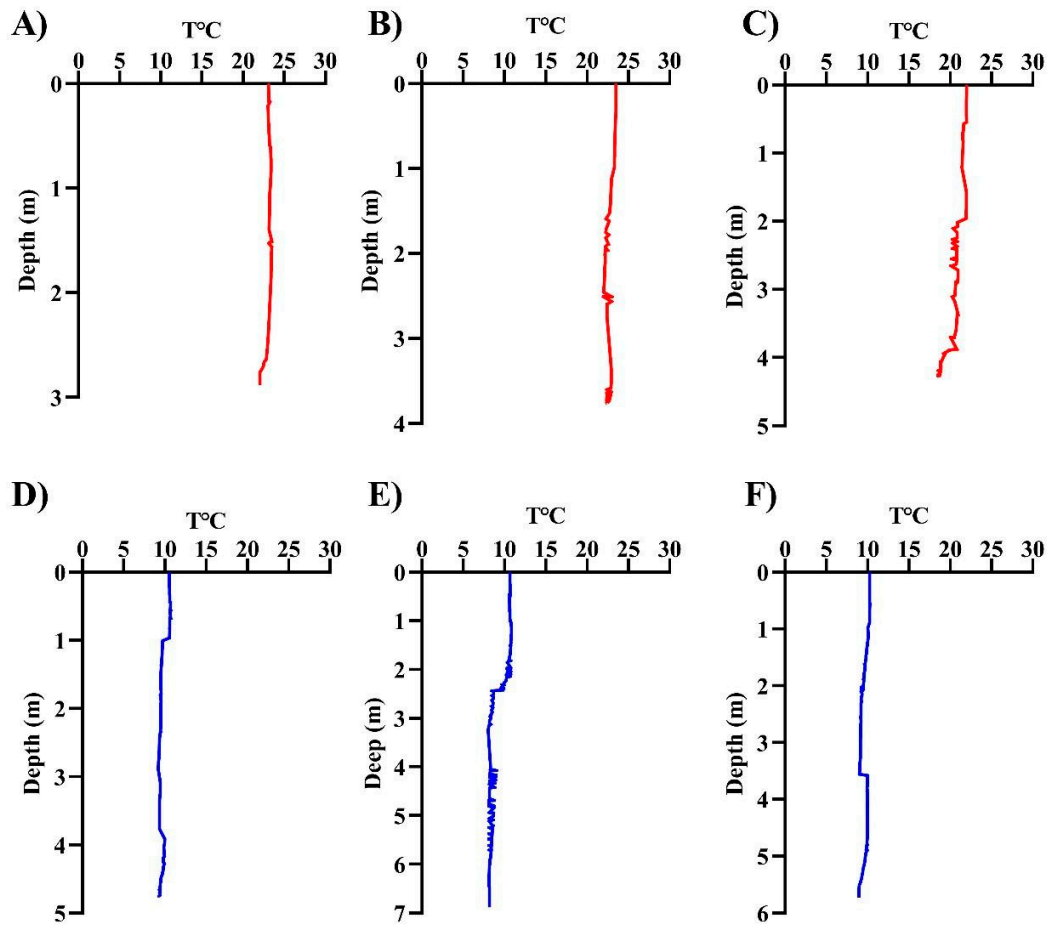

**Figure S1.** Temperature profile in each station monitoring during summer and winter. Letters correspond to the following: a) LK1 summer; b) LK2 summer; c) LK3 summer; d) LK1 winter; e) LK2 winter; f) LK3 winter.
